# Supplementary material for: Structured reporting to improve transparency of analyses in prognostic marker studies
Source: Springer Nature journal article supplement (doi:10.1186/s12916-022-02304-5), 2022-05-12
Supplement: MOESM1 [file 20396552]

**Supplementary to**

**Structured reporting to improve transparency  
of analyses in prognostic marker studies**

Willi Sauerbrei<sup>1\*</sup>, Tim Haeussler<sup>1</sup>, James Balmford<sup>1^</sup> and Marianne Huebner<sup>2</sup>

<sup>1</sup>Institute for Medical Biometry and Statistics, Faculty of Medicine and Medical Center – University of  
Freiburg, Freiburg, Germany

<sup>2</sup>Department of Statistics and Probability, Michigan State University, East Lansing, MI, USA

<sup>^</sup>James Balmford is deceased

\*Correspondence: [wfs@imbi.uni-freiburg.de](mailto:wfs@imbi.uni-freiburg.de)

Hayashi et al (2015) Prognostic factors of HER2-positive breast cancer patients who develop brain metastasis: a multicenter retrospective analysis. *Breast Cancer Res. Treat.* **149**: 277–284, doi:10.1007/s10549-014-3237-7

#### A. Patients, treatment, and variables

|                                                                                                                                                                   |                                                                                                                                                                                                                                                                      |
|-------------------------------------------------------------------------------------------------------------------------------------------------------------------|----------------------------------------------------------------------------------------------------------------------------------------------------------------------------------------------------------------------------------------------------------------------|
| Patients: HER2+ breast cancer with brain metastasis, 04/2001-12/2012, data from 24 of 34 institutions at Japan Clinical Oncology Group, Breast Cancer Study Group |                                                                                                                                                                                                                                                                      |
| <b>1466</b>                                                                                                                                                       | Patients assessed (brain metastasis as first recurrence or developed brain metastases during systemic treatment, HER-2 positive)                                                                                                                                     |
| <b>1034</b>                                                                                                                                                       | Patients excluded (see ref. 5 – data collected for 1466 patients initially)                                                                                                                                                                                          |
| <b>432</b>                                                                                                                                                        | Patients included for analysis                                                                                                                                                                                                                                       |
| Follow-up: Median follow-up 50.6 months                                                                                                                           |                                                                                                                                                                                                                                                                      |
| Marker:                                                                                                                                                           | M1=Estrogen receptor (ER) status                                                                                                                                                                                                                                     |
| Outcomes (Events):                                                                                                                                                | OS (unknown number of events), BMFS (all 432, no results presented here, but refers to a previous paper by the authors)                                                                                                                                              |
| Variables:                                                                                                                                                        | v1=symptoms of brain metastases, v2=number of brain metastases ( $\leq 3 / > 3$ ), v3=histological grade (G1/G2-3)                                                                                                                                                   |
| Treatment/variables:                                                                                                                                              | Time dependent treatments, for details see second paragraph of ‘clinical characteristics’ and Tab.2, t1=trastuzumab before development of brain metastases, t2=trastuzumab after development of brain metastases, t3=lapatinib after development of brain metastases |

Abbreviations: OS=overall survival, time from diagnosis of brain metastasis to death, censored at last follow-up  
BMFS=brain metastasis-free survival, time from breast cancer diagnosis to brain metastasis diagnosis or last follow-up

#### B. Statistical analysis of survival outcomes

| Aim                                 | n                      | Outcome (Events) | Variables considered    | Results/ remarks                                       |
|-------------------------------------|------------------------|------------------|-------------------------|--------------------------------------------------------|
| A1: Effect of treatment             | 432                    | OS (?)           | t2, t3                  | Kaplan-Meier estimate, HR, CI, p-value, Fig. 1, Tab. 2 |
| A2: Combined effect of treatment    | 432                    | OS (?)           | t2, t3                  | Kaplan-Meier estimate, HR, CI, p-value, Fig. 2         |
| A3: Univariate                      | Varies due to missing  | OS (?)           | M1, v1-v3, t1-t3        | HR, CI, p-value, Tab. 2                                |
| A4: Multivariable                   | Unknown due to missing | OS (?)           | v2, t2, t3 <sup>1</sup> | HR, CI, p-value, Text and Tab. 2                       |
| Statistical software packages used: |                        |                  | SPSS v.21               |                                                        |

<sup>1</sup> Unclear whether A4 included only these 3 variables or all variables listed at A3.

Huzell L et al (2015) History of oral contraceptive use in breast cancer patients: impact on prognosis and endocrine treatment response. *Breast Cancer Res. Treat.* **149**: 505–515, doi:10.1007/s10549-014-3252-8

A. Patients, treatment, and variables

|                                                                                                                          |                                                                                                                                                                                                                                          |
|--------------------------------------------------------------------------------------------------------------------------|------------------------------------------------------------------------------------------------------------------------------------------------------------------------------------------------------------------------------------------|
| Patients: Diagnosis of primary breast cancer 2002-2011 at Skåne University Hospital Lund, Sweden                         |                                                                                                                                                                                                                                          |
| <b>1045</b>                                                                                                              | Patients assessed                                                                                                                                                                                                                        |
| <b>51</b>                                                                                                                | Patients excluded (treatment prior to surgery)                                                                                                                                                                                           |
| <b>994</b>                                                                                                               | Patients included for descriptive analysis                                                                                                                                                                                               |
| <b>46</b>                                                                                                                | Patients additionally excluded (in situ carcinoma: 38; metastatic spread within 3 months: 8)                                                                                                                                             |
| <b>948</b>                                                                                                               | Patients included for predictive analysis of risk of an early breast cancer (BC) event                                                                                                                                                   |
| Treatment and follow-up: Standard care. Follow-up up to 9 years (until December 2012); median 3.03 years (IQR 1.93-5.23) |                                                                                                                                                                                                                                          |
| Markers:                                                                                                                 | Oral contraceptive (OC) use:<br>M1 = Ever OC use (yes/no)<br>M2 = Use before age 20 (yes/no)<br>M3 = OC use before first child (yes/no)<br>M4 = OC start 1974 or later (proxy for dose) (yes/no)<br>M5 = Duration of OC use (continuous) |
| Outcomes (events):                                                                                                       | Breast cancer events (BCE) (100): distant metastasis (DM) (65),                                                                                                                                                                          |
| Variables:                                                                                                               | v1 = age, v1_c50 = age $\geq$ 50 (proxy for menopause), v2 = tumor size <sup>1</sup> , v3 = grade <sup>2</sup> , v4 = nodal involvement, v5 = hormone receptor status, v6 = BMI <sup>3</sup> , v7 = endocrine treatment                  |
| Missing data:                                                                                                            | See Tables 1 and 2                                                                                                                                                                                                                       |

Abbreviations: BMI=body mass index, Breast cancer event=local or regional recurrence, distant metastasis or contralateral breast cancer

<sup>1</sup> Invasive tumor size  $\geq$ 21 or muscle or skin involvement (yes/no) in multivariable model

<sup>2</sup> Grade I-II vs grade III in multivariable model

<sup>3</sup> BMI  $\geq$ 25 kg/m<sup>2</sup> (yes/no) in multivariable model

## B. Statistical analysis of survival outcomes

| Aim                                                                        | n   | Events | Outcome                      | Variables considered                     | Results/ remarks                                                                                                               |
|----------------------------------------------------------------------------|-----|--------|------------------------------|------------------------------------------|--------------------------------------------------------------------------------------------------------------------------------|
| IDA1: Data screening and definitions of categories                         | 994 | NA     |                              | M1, M2, M3                               | Stat. methods. Definition of markers (categorization of OC use)                                                                |
| IDA2: descriptive                                                          | 994 | NA     | OC use categories (M1,M2,M3) | v1-6, plus 12 descriptive-only variables | Table 1 (patient characteristics), Table 2 (tumor characteristics)                                                             |
| A1: Multivariable                                                          | 948 | 100    | BCE                          | M1, M2, M3, v1-v6                        | Reported only in text (no data provided), p.508 first column                                                                   |
| A2: Univariate/Multivariable subgroup v1_c50 ≥ 50                          | 760 | 70     | BCE                          | M1, M2, M3, v1-v6                        | For M2: Fig 2a, Tab 3. Kaplan-Meier, Log-rank and HR. M1 and M3 non-significant and reported only in text, p.508 first column  |
| A3: Univariate/Multivariable subgroup v1_c50 < 50                          | 188 | 30     | BCE                          | M1, M2, M3, v1-v6                        | For M2: Fig 2b, Tab 3. Kaplan-Meier, Log-rank and HR. M1 and M3 non-significant and reported only in text, p.508 first column  |
| A4: Multivariable subgroup v1_c50 ≥ 50                                     | ?   | ?      | DM                           | M2; v1-v6                                | Reported in text, no data provided: p.508 second column                                                                        |
| A5: Multivariable subgroup v1_c50 < 50                                     | ?   | ?      | DM                           | M2; v1-v6                                | Log-rank and HR in text, p.508 second column                                                                                   |
| A6: Multivariable                                                          | 948 | 100    | BCE                          | M4; v1-v6                                | HR in text, p.508 second column                                                                                                |
| A7: Multivariable subgroup v1_c50 ≥ 50                                     | 760 | 70     | BCE                          | M4, M5; v1-v6                            | HR in text, p.508 second column                                                                                                |
| A8: Multivariable subgroup v1_c50 < 50                                     | 188 | 30     | BCE                          | M4, M5; v1-v6                            | HR in text, p.508 second column                                                                                                |
| A9: Multivariable subgroup v7 (TAM treatment), v1_c50 (age ≥ 50), v5 (ER+) | 372 | 29     | BCE                          | M1; v1-v7                                | Fig 3a. Kaplan-Meier, Log-rank and HR - adjusted for tumor and patient characteristics, and aromatase inhibitor (AI) treatment |
| A10: Multivariable subgroup v7 (AI treatment), v1_c50 (age ≥ 50), v5 (ER+) | 277 | 26     | BCE                          | M1; v1-v7                                | Fig 3b. Kaplan-Meier, Log-rank and HR - adjusted for tumor and patient characteristics, and tamoxifen (TAM) treatment          |
| Statistical software packages used:                                        |     |        | SPSS v.19                    |                                          |                                                                                                                                |

Jerzak KJ et al (2015) Thyroid hormone receptor  $\alpha$  in breast cancer: prognostic and therapeutic implications. *Breast Cancer Res. Treat.* **149**: 293–301, doi:10.1007/s10549-014-3235-9

#### A. Patients, treatment, and variables

|                                                                                                                                                          |                                                                                                                                                                                                                                                                      |
|----------------------------------------------------------------------------------------------------------------------------------------------------------|----------------------------------------------------------------------------------------------------------------------------------------------------------------------------------------------------------------------------------------------------------------------|
| Patients: Primary invasive breast cancer ( $\geq 1$ cm in diameter) in 2007, tissue samples from the pathology archive, Hamilton Health Sciences, Canada |                                                                                                                                                                                                                                                                      |
| ?                                                                                                                                                        | Patients assessed                                                                                                                                                                                                                                                    |
| ?                                                                                                                                                        | Patients excluded (no adequate tissue was available; treated with neoadjuvant therapy; multifocal tumors; medical history not available; known BRCA mutation)                                                                                                        |
| <b>129</b>                                                                                                                                               | Patients included for analysis <sup>1</sup>                                                                                                                                                                                                                          |
| Treatment and follow-up: Mastectomy or segmental breast resection; minimum follow-up = 5 years                                                           |                                                                                                                                                                                                                                                                      |
| Markers:                                                                                                                                                 | M1 = THR $\alpha$ 1 (continuous/binary), M2= THR $\alpha$ 2 (continuous/binary)                                                                                                                                                                                      |
| Outcomes (events):                                                                                                                                       | OS (22), RFS (36)                                                                                                                                                                                                                                                    |
| Further variables:                                                                                                                                       | v1 = Age (at diagnosis), v2 = tumor size, v3 = nodal stage, v4 = T stage, v5 = stage, v6 = grade, v7 = ER status, v8 = PR status, v9 = HER2 status, v10 = lymphovascular invasion, v11 = mitotic count, v12 = hypothyroid, v13 = chemotherapy, v14 = hormone therapy |
| Missing data:                                                                                                                                            | See Table 1                                                                                                                                                                                                                                                          |

#### B. Statistical analysis of survival outcomes

| Aim                                                 | n                           | Events | Outcome | Variables considered          | Results/ remarks                                                                                                   |
|-----------------------------------------------------|-----------------------------|--------|---------|-------------------------------|--------------------------------------------------------------------------------------------------------------------|
| IDA: Univariate<br>Determine cutpoints<br>M1 and M2 | 129                         | 22     | OS      | M1, M2                        | Stat methods, p.297 results. Action: no optimal cutpoint identified. Allred score $\geq 6$ used instead.           |
| A1: Univariate                                      | Varies,<br>129 for<br>M1/M2 | 36/22  | RFS, OS | M1-2, v1-14                   | Tab 3 (RFS) and Tab 4 (OS), Results. M1 and M2 were analysed continuous, dichotomized, or as a ratio. <sup>2</sup> |
| A2: Univariate                                      | 129                         | 22     | OS      | M2 (bin)                      | Results. K-M plot, Fig 5a                                                                                          |
| A3: Multivariable<br>forward selection<br>(FS)      | 128                         | 36     | RFS     | M1, M2, v1, v2,<br>v4, v6-v12 | Tab 3. Units and/or transformations shown in table. Not reported in text.                                          |

<sup>1</sup> The paper states that the study sample was n=130, however data on the markers M1 and M2 were only available for 129. See Table 1.

<sup>2</sup> Multivariate HR for M2 (cont.) from A3 was mistakenly reported in text.

|                                                 |     |       |                      |                           |                                                                           |
|-------------------------------------------------|-----|-------|----------------------|---------------------------|---------------------------------------------------------------------------|
| A4: Multivariable FS                            | 113 | ?     | RFS                  | M1,M2, v1, v2-v4, v6-v12  | Tab 3. Units and/or transformations shown in table. Not reported in text. |
| A5: Multivariable FS                            | 129 | 22    | OS                   | M1,M2, v1, v2, v4, v6-v12 | Tab 4. Units and/or transformations shown in table. Not reported in text. |
| A6: Multivariable FS                            | 110 | ?     | OS                   | M1,M2, v1, v2-v4, v6-v12  | Tab 4. Units and/or transformations shown in table. Not reported in text  |
| A7: Multivariable                               | 129 | 36/22 | RFS, OS              | M2, v7, others?           | HR, CI, p-value p.299. Only reported in text                              |
| A8: Univariate M1, M2 dichotomized combinations | 129 | 22    | OS                   | M1,M2                     | Fig 5b                                                                    |
| Statistical software packages used:             |     |       | No information given |                           |                                                                           |

Abbreviations: NA=not applicable, NR=not reported, OS=overall survival, RFS=recurrence-free survival

Billingsley et al (2015) Polymerase  $\epsilon$  (POLE) mutations in endometrial cancer: clinical outcomes and implications for Lynch syndrome testing. *Cancer* **121**: 386–394, doi:10.1002/cncr.29046

#### A. Patients, treatment, and variables

|                                                                                                                                                                                     |                                                                                                                  |
|-------------------------------------------------------------------------------------------------------------------------------------------------------------------------------------|------------------------------------------------------------------------------------------------------------------|
| Patients: Matched normal and cancer tissue samples from endometrial cancer patients prospectively collected at time of hysterectomy surgery at Washington University (St Louis, MO) |                                                                                                                  |
| <b>544</b>                                                                                                                                                                          | Patient tissue samples collected                                                                                 |
| <b>9</b>                                                                                                                                                                            | Patients excluded due to unsuccessful molecular analysis of tissues                                              |
| <b>535</b>                                                                                                                                                                          | Patients included for analysis                                                                                   |
| Treatment and follow-up: Hysterectomy; references to several earlier publications; unknown years of surgery; median follow-up 68.4(somatic mutation)/71(wild type) months           |                                                                                                                  |
| Markers:                                                                                                                                                                            | M1=Polymerase $\epsilon$ (POLE) mutational status (somatic mutation vs wild type POLE)                           |
| Outcomes (Events):                                                                                                                                                                  | PFS (unknown number of events) OS (unknown number of events)                                                     |
| Further variables:                                                                                                                                                                  | v1=age (<60/ $\geq$ 60), v2=stage, v3=grade, v4=LVSI, v5=depth of invasion, v6=adjuvant therapy, v7=BMI, v8=race |
| Missing data:                                                                                                                                                                       | Ranged from 0-55 cases for the above variables; complete data only for v1 (Footnote table 2)                     |

Abbreviations: PFS=progression free survival, OS=overall survival, LVSI=lymphovascular space involvement, BMI=body mass index

#### B. Statistical analysis of survival outcomes

| Aim                                                              | n                             | Outcome (Events) | Variables considered | Results/ remarks                                                                              |
|------------------------------------------------------------------|-------------------------------|------------------|----------------------|-----------------------------------------------------------------------------------------------|
| IDA: Comparison of features between POLE mutations and wild type | 30 (mutation)/505 (wild type) | -                | M1,v1-v8             | Distribution of v1-v8, p value of associations M1 with v1-v8, Tab 2                           |
| A1: Univariate                                                   | Varies due to missing data    | PFS (?), OS (?)  | M1, v1-v7            | HR, p-value in Tab 3, Kaplan-Meier for M1 in Fig 2. OS<PFS. Probably an error in the caption. |
| A2: Multivariable (incl. v from A1 with p<0.1)                   | Unknown due to missing data   | PFS (?)          | v1-v6                | HR, p-value, CI, Tab. 4. M1 not included. In univariate analysis p>0.10                       |
| A3: Multivariable (incl. v from A1 with p<0.1)                   | Unknown due to missing data   | OS (?)           | M1, v1-v7            | HR, p-value, CI, Tab. 4                                                                       |
| A4: Multivariable stepwise (incl. v from A1 with p<0.1)          | Unknown due to missing data   | PFS (?)          | v2,v3,v4             | HR, p-value, CI, Supporting Tab. 2                                                            |
| A5: Multivariable stepwise (incl. v from A1 with p<0.1)          | Unknown due to missing data   | PFS (?), OS (?)  | v1,v2,v3,v4          | HR, p-value, CI, Supporting Tab. 2                                                            |
| Statistical software packages used:                              |                               |                  | SAS 9.2; STATA SE 10 |                                                                                               |

Huang et al (2015) Prognostic value of pretreatment circulating neutrophils, monocytes, and lymphocytes in oropharyngeal cancer stratified by human papillomavirus status. *Cancer* **121**: 545–555, doi:10.1002/cncr.29100

#### A. Patients, treatment, and variables

|                                                                                                                             |                                                                                                                                                               |
|-----------------------------------------------------------------------------------------------------------------------------|---------------------------------------------------------------------------------------------------------------------------------------------------------------|
| Patients: Oropharyngeal cancer patients with known HPV status 2000-2010; University of Toronto, Canada                      |                                                                                                                                                               |
| <b>1108</b>                                                                                                                 | Patients assessed (oropharyngeal cancer, treated with primary chemoradiotherapy)                                                                              |
| <b>406</b>                                                                                                                  | Patients excluded (298 HPV unknown; 108 pretreatment complete blood counts unavailable)                                                                       |
| <b>702</b>                                                                                                                  | Patients included for analysis (510 HPV+, 192 HPV-)                                                                                                           |
| Treatment and follow-up: Primary radiotherapy/chemoradiotherapy; median follow-up 5.1 years for HPV+ and 4.1 years for HPV- |                                                                                                                                                               |
| Markers:                                                                                                                    | M1=neutrophil count (CNC), M2=lymphocyte count (CLC), M3=monocyte count (CMC)                                                                                 |
| Outcomes (Events):                                                                                                          | RFS (analyzed as competing risks, 114 HPV+ and 77 HPV-), OS (136 HPV+ and 121 HPV-)                                                                           |
| Further variables:                                                                                                          | v1=age (cont), v2=smoking pack years (>10, ≤10), v3=T classification, v4=N classification, v5=treatment (RT vs RT/CRT), v6=sex, v7=subsite, v8=smoking status |

Abbreviations: RFS=recurrence free survival, OS=overall survival, HPV=human papilloma virus, OPC=oropharyngeal cancer, RT=radiotherapy, CRT=chemoradiotherapy

#### B. Statistical analysis of survival outcomes

| Aim                                                                        | n                              | Outcome (Events)    | Variables considered | Results/ remarks                 |
|----------------------------------------------------------------------------|--------------------------------|---------------------|----------------------|----------------------------------|
| IDA: Associations of variables with markers separately by HPV status       | HPV+ :<br>510<br>HPV- :<br>192 | -                   | M1, M2, M3, v2       | Results, Fig. 1                  |
| A1: Cutpoints of markers determined by median; associations with variables | 510/192                        |                     | M1, M2, M3, v1-v8    | Results, Tab. 1 and 2            |
| A2: Univariate, M1-3 (bin)                                                 | 510 HPV+                       | RFS (114), OS (136) | M1-3                 | HR, CI, p-value, Results, Fig. 2 |
| A3: Univariate, M1-3 (cont)                                                | 510 HPV+                       | RFS (114), OS (136) | M1-3, v1-v5          | HR, CI, p-value, Tab. 3          |
| A4: Multivariable                                                          | 510 HPV+                       | RFS (114), OS       | M1-3, v1-            | HR, CI, p-value,                 |

|                                                 |          |                     |                      |                                        |
|-------------------------------------------------|----------|---------------------|----------------------|----------------------------------------|
| M1-3 (cont)                                     |          | (136)               | v5                   | Results, Tab. 3, C index               |
| C1: Check for proportional hazards <sup>1</sup> | 510 HPV+ | RFS (114), OS (136) | M1-3, v1-v5          | “No violation identified” (text p.548) |
| A5: Univariate, M1-3 (bin)                      | 192 HPV- | RFS (77), OS (121)  | M1-3                 | HR, CI, p-value, Results, Fig. 3       |
| A6: Univariate, M1-3 (cont)                     | 192 HPV- | RFS (77), OS (121)  | M1-3, v1-v5          | HR, CI, p-value, Tab. 3                |
| A7: Multivariable M1-3 (cont)                   | 192 HPV- | RFS (77), OS (121)  | M1-3, v1-v5          | HR, CI, p-value, Results, Tab. 3       |
| Statistical software packages used:             |          |                     | No information given |                                        |

---

<sup>1</sup> Not stated whether this was also carried out in the HPV- group

Price et al (2015) Does the primary site of colorectal cancer impact outcomes for patients with metastatic disease? *Cancer* **121**: 830–835, doi:10.1002/cncr.29129

#### A. Patients, treatment, and variables

|                                                                                                                                                                                     |                                                                                                                                                                                                                                                                                                                                                 |
|-------------------------------------------------------------------------------------------------------------------------------------------------------------------------------------|-------------------------------------------------------------------------------------------------------------------------------------------------------------------------------------------------------------------------------------------------------------------------------------------------------------------------------------------------|
| Patients: Metastatic colorectal cancer (mCRC) data from South Australian mCRC registry, Feb. 2006-Feb. 2013                                                                         |                                                                                                                                                                                                                                                                                                                                                 |
| ?                                                                                                                                                                                   | Patients assessed                                                                                                                                                                                                                                                                                                                               |
| ?                                                                                                                                                                                   | Patients excluded                                                                                                                                                                                                                                                                                                                               |
| <b>2972</b>                                                                                                                                                                         | Patients in the registry and included for analysis. Unclear whether others were assessed and not included in the registry                                                                                                                                                                                                                       |
| <b>Subgroups</b>                                                                                                                                                                    | a=all patients, b=liver resection without chemotherapy (n=57), c=chemotherapy/systemic therapy ±metastasis resection (n=1738), d=liver resection ±chemotherapy (n=123 <sup>1</sup> ), e=chemotherapy/systemic therapy only (n=?)                                                                                                                |
| Treatment and follow-up: Liver resection and/or chemotherapy, or no active treatment. Follow-up (range or median) not reported; some information provided in the Kaplan-Meier plots |                                                                                                                                                                                                                                                                                                                                                 |
| Markers:                                                                                                                                                                            | M=primary colorectal site (binary: left sided including rectum/right sided), M(3)=primary colorectal site (3 groups: left/right/rectum), M(10)=exact anatomical primary site (10 groups)                                                                                                                                                        |
| Outcomes (events):                                                                                                                                                                  | OS <sup>2</sup> (unknown)                                                                                                                                                                                                                                                                                                                       |
| Further variables:                                                                                                                                                                  | v1=sex, v2=age (cont.), v3=stage at diagnosis (binary), v4=grade (4 cat.), v5_1 <sup>3</sup> =metastatic site - liver only, v5_2=lung only, v5_3=liver and lung, v5_4=liver and other (not lung), v5_5=lung and other (not liver), v5_6=other, v6=chemotherapy (y/n), v7=liver surgery (y/n), v8=clinical trials, v9=KRAS exon 2 mutation (y/n) |

Abbreviations: OS=overall survival, mCRC= metastatic colorectal cancer

#### B. Statistical analysis of survival outcomes

| Aim                                              | n                            | Outcome (Events) | Variables considered | Results/ remarks                                                            |
|--------------------------------------------------|------------------------------|------------------|----------------------|-----------------------------------------------------------------------------|
| A0: Patient characteristics by M, M(3) and M(10) | Varies due to missing values | -                | M, v1-v8             | p-values, Tab. 1 for M: v9 not included in Table 1 but discussed in results |
| A1: Effect of M in all patients, univariate      | 2972                         | OS (?)           | M                    | HR (+CI), p-value, Tab. 2                                                   |
| A2: Effect of M in all patients, multivariate    | ? missingness                | OS (?)           | M, v1-v7             | HR (+CI), p-value, Tab. 2; Kaplan-Meier estimate, Numbers at risk, Fig. 1a  |
| A3: Survival in subgroup b                       | 57                           | OS (?)           | M                    | 5-year median OS, p-value                                                   |

<sup>1</sup> Figure 2 however suggests n=414.

<sup>2</sup> OS is undefined, and no information about censoring is provided, other than to say that the final censor date was Feb 12, 2013.

<sup>3</sup> All three of liver, lung and other was probably the referent.

|                                                 |      |        |            |                                                                    |
|-------------------------------------------------|------|--------|------------|--------------------------------------------------------------------|
| A4: Survival in subgroup c                      | 1738 | OS (?) | M          | Kaplan-Meier estimate, HR (+CI), p-value, Numbers at risk, Fig. 1b |
| A5: Survival in subgroup d                      | 123  | OS (?) | M          | Kaplan-Meier estimate, HR (+CI), p-value, Numbers at risk, Fig. 2  |
| A6: Survival in subgroup e                      | ?    | OS (?) | M          | Median OS, p-value                                                 |
| A7: Effect of M(3) in subgroup c <sup>4</sup>   | 1738 | OS (?) | M(3)       | Kaplan-Meier estimate, HR (+CI), p-values, Numbers at risk, Fig. 3 |
| A8: Univariate by M(10)                         | 2972 | OS     | M(10)      | Rate of median OS by M(10)                                         |
| A9: Univariate by M(10) subgroup c <sup>5</sup> | 1738 | OS     | M(10)      | Rate of median OS by M(10)                                         |
| Statistical software packages used:             |      |        | Stata 13.0 |                                                                    |

<sup>4</sup> Results are not shown or discussed for subgroups b, d and e

<sup>5</sup> Results are not shown or discussed for subgroups b, d and e

Gonzalez-Vallinas et al (2015) Clinical relevance of the differential expression of the glycosyltransferase gene GCNT3 in colon cancer. *Eur J Cancer* **51**: 1–8, doi:10.1016/j.ejca.2014.10.021

#### A. Patients, treatment, and variables

|                                                                                                                                                                                      |                                                                                                                                                                                       |
|--------------------------------------------------------------------------------------------------------------------------------------------------------------------------------------|---------------------------------------------------------------------------------------------------------------------------------------------------------------------------------------|
| Patients: FFPE <sup>1</sup> samples from curative resection of colon cancer patients at La Paz University Hospital, Madrid                                                           |                                                                                                                                                                                       |
| ?                                                                                                                                                                                    | Patients assessed (age ≥18, stage II primary colon cancer, follow-up ≥ 36 months, high quality RNA sample - 3/1 excluded in training/validation series)                               |
| ?                                                                                                                                                                                    | Patients excluded (incomplete excision, death within 30 days of surgery, mixed histological features, other cancers in prev. 5 years, inflammatory bowel disease, hereditary tumours) |
| <b>77/119</b>                                                                                                                                                                        | Patients included for analysis (training series/validation series)                                                                                                                    |
| <b>18</b>                                                                                                                                                                            | Healthy tissue samples                                                                                                                                                                |
| Treatment and follow-up: FFPE samples from curative resection from 2000-04 (training series, median follow-up 72 months) and 2005-08 (validation series, median follow-up 42 months) |                                                                                                                                                                                       |
| Markers:                                                                                                                                                                             | M1=GCNT3 expression (dichotomized)                                                                                                                                                    |
| Outcomes (Events):                                                                                                                                                                   | Disease-free survival (DFS) (22/18) <sup>2</sup>                                                                                                                                      |
| Further variables:                                                                                                                                                                   | v1=age (≤70/>70), v2=localisation, v3=grade, v4=sex, v5=no. of lymph nodes, v6=T stage, v7=chemotherapy, v8=vascular invasion, v9=perineural invasion                                 |

DFS: recurrence as only event mentioned

#### B. Statistical analysis of survival outcomes

| Aim                                                   | n (training/validation series) | Outcome (Events) | Variables considered | Results/ remarks                                                                     |
|-------------------------------------------------------|--------------------------------|------------------|----------------------|--------------------------------------------------------------------------------------|
| A1: Comparison to healthy tissue                      | 77/119<br>18 healthy           | -                | M1(continuous)       | p-value, t-test, Fig. 1                                                              |
| A2: Determine 'optimal' cutpoint in training series   | 77                             | DFS (22)         | M1 (continuous)      | c-index using 100 times 5-fold cross-validation, cutpoint set to 2.75 Q <sup>3</sup> |
| A3: Univariate, training series                       | 77                             | DFS (22)         | M1                   | Kaplan-Meier-estimate, p-value, Fig. 2a; HR, CI, Tab. 2                              |
| A4: Univariate, validation series                     | 119                            | DFS (18)         | M1                   | Kaplan-Meier-estimate, p-value, Fig. 2b; HR, CI, Tab. 2                              |
| IDA: Correlation to M1, univariate, validation series | Varies due to missing data     |                  | M1, v1-v9 (probably) | v6, v8, v9 significant (p<0.05), p.4 second column                                   |
| A5: Multivariable, training series                    | ?                              | DFS (?)          | M1, v1, v6, v8, v9   | HR, p-value, CI, Tab. 2. Age + sign. variables in IDA                                |

<sup>1</sup> FFPE = Formalin-fixed, paraffin-embedded.

<sup>2</sup> Colon cancer-specific death also quantified, however not examined in any analyses.

<sup>3</sup> Q = Quantification of GCNT3 expression, calculated with the 2<sup>-ΔCt</sup> method.

|                                            |     |          |                                            |                         |
|--------------------------------------------|-----|----------|--------------------------------------------|-------------------------|
| A6:<br>Multivariable,<br>validation series | 119 | DFS (18) | M1, v1, v6, v8,<br>v9                      | HR, p-value, CI, Tab. 2 |
| Statistical software packages used:        |     |          | R v. 2.15 (survival)<br>SPSS v.20 (t-test) |                         |

Hokuto D et al (2015) Clinical impact of herpesvirus entry mediator expression in human hepatocellular carcinoma. *Eur J Cancer* **51**: 157–165, doi:10.1016/j.ejca.2014.11.004

#### A. Patients, treatment, and variables

|                                                                                                                 |                                                                                                                                                                                                                                                                                                                           |
|-----------------------------------------------------------------------------------------------------------------|---------------------------------------------------------------------------------------------------------------------------------------------------------------------------------------------------------------------------------------------------------------------------------------------------------------------------|
| Patients: Hepatocellular carcinoma surgery, 2000-2012 at Nara Medical University, Japan                         |                                                                                                                                                                                                                                                                                                                           |
| ?                                                                                                               | Patients assessed (surgery for HCC between 2000 and 2012)                                                                                                                                                                                                                                                                 |
| ?                                                                                                               | Patients excluded                                                                                                                                                                                                                                                                                                         |
| <b>150</b>                                                                                                      | Patients included for analysis                                                                                                                                                                                                                                                                                            |
| Treatment and follow-up: Surgical resection. Follow-up until Sep. 2013 (median 51.8 months, range 6.7 to 151.7) |                                                                                                                                                                                                                                                                                                                           |
| Markers:                                                                                                        | M = HVEM expression (cont. variable, dichotomized by cutoff at 50% stained)                                                                                                                                                                                                                                               |
| Outcomes (Events):                                                                                              | RFS (86), OS (?), IHR (78), EHR (36), Early recurrence (within 2 years after surgery, 51)                                                                                                                                                                                                                                 |
| Further variables: <sup>1</sup>                                                                                 | v1 = age*, v2 = gender, v3 = cirrhosis, v4 = viral status, v5 = AFP level*, v6 = PIVKA-II*, v7 = tumour size (<5cm/≥5cm), v8 = tumour number (single/multiple), v9 = histol. differentiation (well/moderate or poor), v10 = vascular invasion, v11 = capsule invasion, v12 = TNM stage (I/II-IV), v13=alcohol consumption |

\*dichotomized at the median

Abbreviations: IHR/EHR = intra-/extra-hepatic recurrence

#### B. Statistical analysis of survival outcomes

| Aim                                 | n   | Outcome (Events)                          | Variables considered | Results/ remarks                                            |
|-------------------------------------|-----|-------------------------------------------|----------------------|-------------------------------------------------------------|
| IDA1: Correlation                   | 150 | -                                         | M, v1-v13            | p-values for M (binary) with Vx; $\chi^2$ or t-test, Tab. 1 |
| IDA2: Cutpoints at median           |     |                                           | v1,v5,v6             | Stat methods                                                |
| A1: Univariate                      | 150 | RFS (86), OS (?)                          | M                    | Kaplan-Meier estimates, p-values, Fig. 2                    |
| A2: Univariate                      | 150 | RFS (86), OS (?)                          | M, v1-v12            | HR, CI, p-values, Tab. 2                                    |
| A3: Multivariate                    | 150 | RFS (86), OS (?)                          | M, v6, v7, v10       | HR, CI, p-values, Tab. 3, variable selection unclear        |
| A4: Univariate                      | 150 | IHR (78), EHR (36), early recurrence (51) | M                    | Chi-square p-values, Tab. 4                                 |
| Statistical software packages used: |     |                                           | No information given |                                                             |

<sup>1</sup> All variables binary.

Thurner et al (2015) The elevated C-reactive protein level is associated with poor prognosis in prostate cancer patients treated with radiotherapy. *Eur J Cancer* **51**: 610–619, doi:10.1016/j.ejca.2015.01.002

#### A. Patients, treatment, and variables

|                                                                                                                                                       |                                                                                                                                               |
|-------------------------------------------------------------------------------------------------------------------------------------------------------|-----------------------------------------------------------------------------------------------------------------------------------------------|
| Patients: Treated for primary prostate cancer at the Department of Therapeutic Radiology and Oncology, Medical University of Graz, Austria, 2003-2007 |                                                                                                                                               |
| >700                                                                                                                                                  | Patients assessed                                                                                                                             |
| >439                                                                                                                                                  | Patients excluded (Did not meet below criteria, as well as those with a follow-up of < 4 months) <sup>1</sup>                                 |
| 261                                                                                                                                                   | Patients included for analysis (histologically confirmed primary prostate cancer + pre-treatment CRP levels taken)                            |
| Treatment and follow-up: 3D radiation therapy in curative intent; median follow-up 80 months                                                          |                                                                                                                                               |
| Markers:                                                                                                                                              | M = pre-treatment CRP (continuous variable; analyses for dichotomized or categorical data, based on optimal cutpoints)                        |
| Outcomes (events):                                                                                                                                    | CSS – primary outcome (24), OS (59), DFS (56)                                                                                                 |
| Further variables:                                                                                                                                    | v1 = age at diagnosis, v2 = PSA at diagnosis, v3 = tumor stage, v4 = Gleason score, v5 = risk group <sup>2</sup> , v6 = total duration of ADT |

Abbreviations: CRP=C-reactive protein, CSS=Cancer-specific survival: time from diagnosis to date of prostate cancer related death, OS=Overall survival, DFS=Clinical disease-free survival, ADT=androgen deprivation therapy

#### B. Statistical analysis of survival outcomes

| Aim                                                                  | n                   | Outcome (Events)                               | Variables considered  | Results/ remarks                                                                                  |
|----------------------------------------------------------------------|---------------------|------------------------------------------------|-----------------------|---------------------------------------------------------------------------------------------------|
| IDA1: Correlations                                                   | Varies <sup>3</sup> |                                                | M, v1-v5              | Results p.613 first column                                                                        |
| IDA2: Determination of optimal cutpoint for M                        | 261                 | CSS (24)                                       | M                     | CRP dichotomised into high ( $\geq 8.6 \text{ mg l}^{-1}$ ) and low ( $< 8.6 \text{ mg l}^{-1}$ ) |
| A1: Univariate survival analysis                                     | 261                 | A1.1 CSS (24)<br>A1.2 OS (59)<br>A1.3 DFS (56) | M                     | Kaplan-Meier-estimates, figures 1-3                                                               |
| A2: Univariate associations                                          | Varies              | A2.1 CSS (24)<br>A2.2 OS (59)<br>A2.3 DFS (56) | M, v1, v2, v3, v4, v6 | HR, CI, p-values, Tab. 2-4                                                                        |
| A3: Multivariate (incl. v. from A2.1, A2.2 and A2.3 with $p < .05$ ) | ?                   | CSS (?)<br>OS (?)<br>DFS (?)                   | M, v2, v3, v4, v6     | HR, CI, p-values, Tab. 2 (CSS), Tab. 3 (OS), Tab. 4 (DFS)                                         |
| A4: Univariate, high risk (v5)                                       | 144                 | A4.1 CSS (?)<br>A4.2 OS (?)<br>A4.3 DFS (?)    | M                     | HR, CI, p-value, Tab. 5                                                                           |

<sup>1</sup> It is not stated how many patients had a follow-up of < 4 months, nor whether these were excluded prior to the final 261 or were excluded from the 261 in subsequent analyses. We will assume the former.

<sup>2</sup> Three categories; see ref. 31.

<sup>3</sup> Due to missing data. Numbers are available in Table 1.

|                                                                    |               |                                                                                      |           |                                                                                       |
|--------------------------------------------------------------------|---------------|--------------------------------------------------------------------------------------|-----------|---------------------------------------------------------------------------------------|
| A5: Multivariate, high risk (v5)                                   | 144           | A5.1 CSS (?)<br>A5.2 DFS (?)                                                         | M, v6     | HR, CI, p-value, Tab. 5 <sup>4</sup>                                                  |
| A6: Univariate, intermediate risk (v5)                             | 66            | A6.1 CSS (?)<br>A6.2 OS (?)<br>A6.3 DFS (?)                                          | M         | p values in text, p.615 first column (all n.s.)                                       |
| A7: Univariate, low risk (v5)                                      | 51            | A7.1 CSS (?)<br>A7.2 OS (?)<br>A7.3 DFS (?)                                          | M         | p values in text, p.615 first column (all n.s.)                                       |
| IDA3: Cutpoint determination for M in subgroups of v5              | 261           | CSS (24)                                                                             | M         | CRP categorised with cut-off values of 8.9, 8.4 and 13.4 for the v5 risk groups       |
| A8: Univariate by v5 subgroups                                     | 144/66/<br>51 | A8.1 High-risk, CSS (?)<br>A8.2 Intermediate-risk, CSS (?)<br>A8.3 Low-risk, CSS (?) | M         | No data shown, p.615 first column (findings same as A4.1, A6.1 and A7.1)              |
| IDA4: Cutpoint determination for M in subgroups of v6 <sup>5</sup> | 261           | CSS (24)                                                                             | M         | CRP dichotomised with cut-off values of 6.7 and 8.9 for patients with and without ADT |
| A9: Univariate by v6 subgroups                                     | ??            | A9.1 CSS (?)<br>A9.2 OS (?)<br>A9.3 DFS (?)                                          | M         | HR, CI, p-value, p.615 first and second columns                                       |
| Statistical software packages used:                                |               |                                                                                      | SPSS v.20 |                                                                                       |

<sup>4</sup> No multivariate analysis was carried out for OS because v6 was not significant at A4.

<sup>5</sup> Here defined as with/without ADT

Keck et al (2015) Neuropilin-2 and its ligand VEGF-C predict treatment response after transurethral resection and radiochemotherapy in bladder cancer patients. *International Journal of Cancer* **136**: 443–451, doi:10.1002/ijc.28987

#### A. Patients, treatment, and variables

|                                                                                                     |                                                                                                                                                                                                           |
|-----------------------------------------------------------------------------------------------------|-----------------------------------------------------------------------------------------------------------------------------------------------------------------------------------------------------------|
| Patients: Bladder cancer patients (cN0M0 tumors) at Universitätsklinikum Erlangen between 1982-2007 |                                                                                                                                                                                                           |
| <b>473</b>                                                                                          | Patients assessed                                                                                                                                                                                         |
| <b>226</b>                                                                                          | Patients possibly excluded (see ref. 4 “same cohort” - 473 patients) due to missing data?                                                                                                                 |
| <b>247</b>                                                                                          | Probably patients with complete data (M1, M2, v1-v10) included for analysis                                                                                                                               |
| Treatment and follow-up: Bladder-sparing therapy (TURBT); follow-up time up to 15 years             |                                                                                                                                                                                                           |
| Markers:                                                                                            | M1 = NRP2 expression, M2 = VEGF-C expression, M3 = M1 and M2 combined                                                                                                                                     |
| Outcomes (events):                                                                                  | OS(number of events unknown), CSS(number of events unknown)                                                                                                                                               |
| Further variables:                                                                                  | v1=age, v2=sex, v3=tumor stage, v4=tumor grade, v5=resection status, v6=lymphatic vessel invasion, v7=blood vessel invasion, v8=carcinoma in situ, v9=multifocal tumor occurrence, v10=histologic subtype |
| Treatment in addition to TURBT:                                                                     | T = RCT (subgroup t1, n=198) or RT only (subgroup t2, n=49)                                                                                                                                               |

Abbreviations: CSS=Cancer specific survival, TURBT=Transurethral resection of bladder tumor, RCT=Radiochemotherapy, RT=Radiotherapy only

#### B. Statistical analysis of survival outcomes

| Aim                                                                | n                  | Outcome (no. of events never known!) | Variables considered | Results/ remarks                                                          |
|--------------------------------------------------------------------|--------------------|--------------------------------------|----------------------|---------------------------------------------------------------------------|
| A1: Univariate, in 7 subgroups defined by combinations of v3 and T | varies by subgroup | OS, CSS                              | M1-M3                | p-values, Tab. 2                                                          |
| A2: All patients                                                   | 247                | OS, CSS                              | M1-M3                | Kaplan-Meier estimates, p-values (log-rank test), Fig. 2                  |
| A3: Subgroup t1                                                    | 198                | OS, CSS                              | M1-M3                | Kaplan-Meier estimates, p-values (log-rank test), Fig. 3                  |
| A4: Subgroup t2                                                    | 49                 | OS, CSS                              | M1-M3                | Kaplan-Meier estimates, p-values (log-rank test), Supporting Inf. Fig. S1 |
| A5: Univariate all patients                                        | 247                | OS, CSS                              | M1-M3                | RR <sup>1</sup> , CI, p-values, Tab. 3                                    |
| A6: Univariate subgroup t1                                         | 198                | OS, CSS                              | M1-M3                | RR, CI, p-values, Tab. 3                                                  |

<sup>1</sup> A5-A8: Labelled as relative risk in Table 3, but should be a hazard ratio

|                                     |     |           |                                         |                                   |
|-------------------------------------|-----|-----------|-----------------------------------------|-----------------------------------|
| A7: Multivariate<br>all patients    | 247 | OS, CSS   | M1-M3,<br>adjusted<br>for v1-<br>v10, T | RR, CI, p-values, Tab. 3,<br>Text |
| A8: Multivariate subgroup<br>t1     | 198 | OS, CSS   | M1-M3,<br>adjusted<br>for v1-v10        | RR, CI, p-values, Tab. 3,<br>Text |
| Statistical software packages used: |     | SPSS v.21 |                                         |                                   |

Rödel et al (2015) Human papillomavirus DNA load and p16INK4a expression predict for local control in patients with anal squamous cell carcinoma treated with chemoradiotherapy. *International Journal of Cancer* **136**: 278–288, doi:10.1002/ijc.28979

#### A. Patients, treatment, and variables

|                                                                                                                     |                                                                                                                    |
|---------------------------------------------------------------------------------------------------------------------|--------------------------------------------------------------------------------------------------------------------|
| Patients: Anal squamous cell carcinoma (SCC) treated at University Hospitals Frankfurt and Göttingen (time period?) |                                                                                                                    |
| ?                                                                                                                   | Patients assessed (histological proof, curative intent of 5-FU-based chemoradiotherapy (CRT))                      |
| ?                                                                                                                   | Patients excluded                                                                                                  |
| <b>95</b>                                                                                                           | Patients included for analysis, patients with data for HPV16 DNA load (n=80)                                       |
| Treatment and follow-up: Homogeneously with standard CRT; median follow-up 40 months (range 1-264 months)           |                                                                                                                    |
| Markers:                                                                                                            | M1 = HPV16 DNA load*, M2 = p16 <sup>INK4a</sup> expression**, M3 = combining dichotomized versions of M1 and M2*** |
| Outcomes (events):                                                                                                  | incidence of local failure (IL, n=21), incidence of distant metastases (ID, n=14), OS (n=27), CSS (n=16)           |
| Further variables:                                                                                                  | v1=age, v2=gender, v3=HIV status, v4=T-stage, v5=N-stage, v6=grading, v7=HPV genotype                              |

\*dichotomized at the median

\*\*score system (see text paragraph “Immunohistochemical...” p. 280), dichotomized

\*\*\*partly 2 categories (see Supp. tab. 1) and partly 3 categories (see Fig. 4)

Abbreviations: OS=time from start of CRT to death from all causes, CSS = time from start of CRT to cancer related death

#### B. Statistical analysis of survival outcomes

| Aim                                                  | n                  | Outcome (Events)                                 | Variables considered | Results/ remarks                                                                                             |
|------------------------------------------------------|--------------------|--------------------------------------------------|----------------------|--------------------------------------------------------------------------------------------------------------|
| IDA1: Distribution of v7, dependencies in 2x2 tables | 95 (M2)<br>80 (M1) |                                                  | M1, M2, v1-v7        | p-values, Tab. 1, Tab. 2                                                                                     |
| IDA2: Define categories for M1                       | 95                 |                                                  | M1                   | Results. Use median. Low/high                                                                                |
| IDA3: Define categories for M1 and M2                | 95(M2),<br>80 (M1) |                                                  | M1, M2               | Methods: Low/intermediate/high (see last paragraph p.280)                                                    |
| A1: Univariate <sup>1</sup>                          | 95 (M2)<br>80 (M1) | IL (21), ID (14), CSS (27), OS (16) <sup>2</sup> | M1, M2, v1-v6        | p-values, Kaplan-Meier estimates, 5y and 10y cumulative incidence of IL and ID in text, Tab. 3, Figs 2 and 3 |

<sup>1</sup> One missing value for v4 and six for v5; exact number of events unknown for analyses involving these variables.

<sup>2</sup> Events unknown for M1 however due to the exclusion of 15 cases

|                                         |                    |                                              |                    |                                                                                    |
|-----------------------------------------|--------------------|----------------------------------------------|--------------------|------------------------------------------------------------------------------------|
| A2: Multivariable <sup>3</sup>          | 80 <sup>4</sup>    | IL (?)                                       | M1, M2, v2, v4, v5 | p-values, HR, CI, Tab. 3                                                           |
| A3: Multivariable                       | 89                 | ID (?)                                       | v2, v4, v5         | p-values, HR, CI, Tab. 3                                                           |
| A4: Multivariable                       | 89                 | CSS (?)                                      | v2, v4, v5, v6     | p-values, HR, CI, Tab. 3                                                           |
| A5: Multivariable                       | 80                 | OS (?)                                       | M1, v2, v4, v5     | p-values, HR, CI, Tab. 3                                                           |
| A6: Combined marker M3, univariate      | 80                 | IL (?), ID (?), CSS (?), OS (?)              | M3, v1-v6          | p-values, Kaplan-Meier estimates, Fig. 4, Supp. tab. 1                             |
| A7: Combined marker M3, multivariable   | 80                 | IL (?), CSS (?), OS (?)                      | M3, v1-v6          | p-values, HR, CI, text, Supp. tab. 1                                               |
| A8: Alternative cutpoints for M1 and M2 | 95 (M2)<br>80 (M1) | IL (?), ID (?), CSS (?), OS (?) <sup>5</sup> | M1, M2             | Kaplan-Meier estimates, p-values, text (end of “Results”), Supp. tab. 2, Supp. fig |
| Statistical software packages used:     |                    |                                              | SPSS v.19          |                                                                                    |

<sup>3</sup> Analyses A2-A5 only include significant variables from A1.

<sup>4</sup> Minus an unknown number of missing cases; same for A5, A6 and A7.

<sup>5</sup> 5-year survival rates for each outcome.

Schirripa M et al (2015) Role of NRAS mutations as prognostic and predictive markers in metastatic colorectal cancer. *Int. J. Cancer* **136**: 83–90, doi:10.1002/ijc.28955

#### A. Patients, treatment, and variables

|                                                                                                                                                                             |                                                                                                                                                                                                                                                                                                                                                                                                                                                                                                |
|-----------------------------------------------------------------------------------------------------------------------------------------------------------------------------|------------------------------------------------------------------------------------------------------------------------------------------------------------------------------------------------------------------------------------------------------------------------------------------------------------------------------------------------------------------------------------------------------------------------------------------------------------------------------------------------|
| Patients: Tissue samples from patients with metastatic colorectal cancer (mCRC) from 2009-2012 were analysed at the pathology department of the University Hospital of Pisa |                                                                                                                                                                                                                                                                                                                                                                                                                                                                                                |
| ?                                                                                                                                                                           | Patients with available KRAS, BRAF and NRAS mutational status included                                                                                                                                                                                                                                                                                                                                                                                                                         |
| ?                                                                                                                                                                           | Patients excluded                                                                                                                                                                                                                                                                                                                                                                                                                                                                              |
| <b>786</b>                                                                                                                                                                  | Patients included for analysis                                                                                                                                                                                                                                                                                                                                                                                                                                                                 |
| Treatment and follow-up: Follow-up not mentioned                                                                                                                            |                                                                                                                                                                                                                                                                                                                                                                                                                                                                                                |
| Markers:                                                                                                                                                                    | M1=NRAS mutation (y/n), M2=KRAS mutation (y/n), M3=BRAF mutation (y/n), M4=all wt (no NRAS, KRAS or BRAF mutation)(y/n) <sup>1</sup>                                                                                                                                                                                                                                                                                                                                                           |
| Outcomes (events):                                                                                                                                                          | OS (?), PFS (?)                                                                                                                                                                                                                                                                                                                                                                                                                                                                                |
| Further variables:                                                                                                                                                          | v1=sex, v2=age at diagnosis, v3=ECOG PS (0/1-2), v4=primary tumor site (nominal), v5=mucinous histology (y/n), v6=tumoral penetration (pT)(1-2/3-4), v7=nodal involvement (pN)(0/1-2), v8=time to metastasis (mts)(binary), v9=number of mts (1/>1), v10=resected primary (y/n), v11=liver only mts (y/n), v12=liver mts (y/n), v13=lung mts (y/n), v14=nodes mts (y/n), v15=peritoneal mts (y/n), v16=bone mts (y/n), v17=metastasis site (v11-v16) classified into 6 categories; see Table 2 |

Abbreviations: OS=overall survival (time from diagnosis of metastatic disease to death of all causes), PFS=progression free survival (time from beginning of treatment to disease progression or death of any cause)

#### B. Statistical analysis of survival outcomes

| Aim                                                | n                                  | Outcome (Events) | Variables considered             | Results/ remarks                                                                 |
|----------------------------------------------------|------------------------------------|------------------|----------------------------------|----------------------------------------------------------------------------------|
| IDA: Homogeneity                                   | (786)<br>various n due to missing  | -                | M1-M4, v1-v9, v11-v17            | p-values, Tab. 1- 2, and various subgroup analyses reported in text only (p. 85) |
| A1: Univariate                                     | 786                                | OS (?)           | M1- M4                           | Kaplan-Meier-estimate, Log-rank-test (p-value) Fig. 1                            |
| A2: Univariate                                     | 321 (47 (M1) + 274 (M4) see Tab.1) | OS (?)           | M1, M4                           | Kaplan-Meier-estimate, HR, CI, p-value, Fig. 2                                   |
| A3: Univariate                                     | Varies                             | OS (?)           | M1-M4, v3-v5, v8, v10, v11       | HR, CI, p-value, Tab. 3 <sup>2</sup>                                             |
| A4: Multivariable M1 vs M4, M2 vs M4, and M3 vs M4 | Varies but unknown                 | OS (?)           | adjusted for v3-v5, v8, v10, v11 | HR, CI, p-value, Tab. 4                                                          |

<sup>1</sup> Tested for NRAS mutation only in patients with wtKRAS and wtBRAF.

<sup>2</sup> Only significant analyses shown in Table 3. What about others, e.g. v7: non-significant? No statement!

|                                                                                        |   |                      |                      |             |
|----------------------------------------------------------------------------------------|---|----------------------|----------------------|-------------|
| Additional:<br>NRAS patients<br>treated with anti-<br>EGFR<br>monoclonal<br>antibodies | 8 | Median OS<br>and PFS |                      | See page 87 |
| Statistical software packages used                                                     |   |                      | No information given |             |

Martin et al (2015) Diagnostic criteria for the classification of cancer-associated weight loss. *J. Clin. Oncol.* **33**: 90-99, doi:10.1200/JCO.2014.56.1894

#### A. Patients, treatment, and variables

|                                                                                                                                                    |                                                                                                                                                                                                                                                                                     |
|----------------------------------------------------------------------------------------------------------------------------------------------------|-------------------------------------------------------------------------------------------------------------------------------------------------------------------------------------------------------------------------------------------------------------------------------------|
| Patients: Cancer patients in supportive/palliative care or surgical or medical oncology, T: 12 institutions in 9 countries; V: Montpellier, France |                                                                                                                                                                                                                                                                                     |
| <b>T: 8737, V: 3075</b>                                                                                                                            | Patients assessed (data from 12 (training T) and 1 (validation V) data sets - Tab. 1)                                                                                                                                                                                               |
| <b>T: 577, V: 382</b>                                                                                                                              | Patients excluded (weight gain (T: n=515), age<18, carcinoma in situ, missing weight loss and BMI data, missing survival data)                                                                                                                                                      |
| <b>T: 8160, V: 2693</b>                                                                                                                            | Patients included for analysis                                                                                                                                                                                                                                                      |
| Treatment and follow-up: Routine clinical practice. Median-follow-up T 41.3 months, V 25.7 months                                                  |                                                                                                                                                                                                                                                                                     |
| Markers:                                                                                                                                           | M1=BMI (cont.), M1(10)=BMI (10 cat: deciles), M1(5)=BMI (5 cat), M2=PWL (% weight loss, cont.), M2(11)=PWL (11 cat: deciles PWL + weight stable), M2(5)=PWL (5 cat), M3=BMI-adjusted WL grading system (5 cat), simplifying 25(m1(5) x m2(5)) combination by similarity in survival |
| Outcomes (events):                                                                                                                                 | OS (T: 6294, V: unclear: 1713-1716, see Tab. 4 – 1713 deaths, but n only 2690)                                                                                                                                                                                                      |
| Further variables:                                                                                                                                 | v1=age (cont.), v1b=age (binary, cutpoint 65), v2=sex, v3=cancer site ('diagnosis'), v4=cancer stage, v5=performance status, v6=health care setting, v7=weight*, v8=height*                                                                                                         |

\*not used in any survival analysis, given in Tab. 2

Abbreviations: OS=overall survival, defined as time from WL and BMI assessment and death.

#### B. Statistical analysis of survival outcomes

| Aim                                                         | n                               | Outcome (Events) | Variables considered | Results/ remarks                                                                                          |
|-------------------------------------------------------------|---------------------------------|------------------|----------------------|-----------------------------------------------------------------------------------------------------------|
| A1(T): Univariate                                           | Varies due to missing           | OS (varies)      | M1, M2, v1, v2-v5    | median OS (+CI), HR(+CI), p-value, Tab. 3                                                                 |
| A2(T): Multivariable                                        | ? perhaps 7015 (see v5, Tab. 2) | OS (?)           | M1, M2, v1, v2-v5    | HR (+CI), p-value, Tab. 3                                                                                 |
| A2.5(T): Univariate weight loss over time frames            | 8137                            | OS (6279)        | M2                   | p-values, data not shown. Results p.94                                                                    |
| A3(V): Multivariable                                        | ? perhaps 2598 (see v4, Tab. 2) | OS (?)           | M1, M2, v1, v2-v5    | HR (+CI), p-value, Tab. 3                                                                                 |
| A4(T): To simplify BMI(10) and PWL(11) to BMI(5) and PWL(5) | 8160 (M1), 8138* (M2)           | OS (6294, 6279)  | M1(10), M2(11)       | Median OS, HR, indication of significance (p<.05) between deciles, Fig. 1, Text section 'BMI Adjusted...' |

|                                                                                       |                                   |                                   |                        |                                                                                                                  |
|---------------------------------------------------------------------------------------|-----------------------------------|-----------------------------------|------------------------|------------------------------------------------------------------------------------------------------------------|
| A5(T): 25 (M1(5) x M2(5)) subgroups, to derive M3 - combining groups with similar HRs | 8138*                             | OS (6279)                         | M1(5), M2(5)           | Median OS (+CI), HR, 5x5 matrices, indication of significance (p<.05) between cells, Fig. 2 (+legend), Text p.95 |
| A6(T): Separation by M3                                                               | 8138*                             | OS (6279)                         | M3                     | c-statistic (+CI), Text p.95                                                                                     |
| A7(T): Effect of M3, multivariable                                                    | Unknown (8138 in M3, but missing) | OS (?)                            | M3, v1, v2-v5          | HR (+CI), p-values, Text p. 95                                                                                   |
| A8(T): Effect of standard factors in subgroups defined by M3, univariate              | Varies                            | OS (varies)                       | M3, v1b, v3-v6         | For 'variables with adequate sample size', median OS (+CI), p-values (for trend?), Tab. 4                        |
| A9(T): Effect of standard factors in subgroups defined by M3, multivariable           | Varies                            | OS (varies)                       | M3, v1, v1b, v3-v6     | p-values (for trend?), Tab. 4 adjusted for v1-v5                                                                 |
| A10(T): Effect of M3 in selected subgroups defined by v3                              | A: 947<br>B: 993                  | OS (A=804, B=455)                 | M3, v3                 | Kaplan-Meier estimates, p-values, 2 (highly selected?) subgroups presented, Fig. 3                               |
| A11(V): Separation by M3                                                              | 2690                              | OS (1713)                         | M3                     | c-statistic (+CI), Text p.97                                                                                     |
| A12(V): Univariate                                                                    | 2690                              | OS (1713)                         | M3                     | p-value (for trend?), Tab. 4                                                                                     |
| A13(V): Multivariable                                                                 | ? perhaps 2598 (see v4, Tab. 2)   | OS (?)                            | M3                     | p-value (for trend?), Tab. 4 adjusted for v1-v5                                                                  |
| A14(T): As A2 – estimates in subgroup (v4=III or IV)                                  | ? perhaps 7284 (see v4, Tab. 3)   | OS (perhaps 5953, see v4, Tab. 3) | M1, M2, v1, v2, v3, v5 | HR (+CI), p-value, legend a bit misleading, Tab. A1                                                              |
| A15(T): As A7 – estimates in subgroup (v4=III or IV)                                  | ? perhaps 7284 (see v4, Tab. 3)   | OS (perhaps 5953, see v4, Tab. 3) | M3, v1, v2, v3, v5     | HR (+CI), p-value, legend a bit misleading, Tab. A2                                                              |
| Statistical software packages used:                                                   |                                   |                                   | SPSS 22.0              |                                                                                                                  |

\*8137 in Tab. 3, 8138 in Fig. 1 and 2

Ostronoff et al (2015) Prognostic significance of NPM1 mutations in the absence of FLT3-internal tandem duplication in older patients with acute myeloid leukemia: a SWOG and UK National Cancer Research Institute/Medical Research Council report. *J. Clin. Oncol.* **33**: 1157–1164, doi:10.1200/JCO.2014.58.0571

A. Patients, treatment, and variables

|                                                                                                                                                                                                                            |                                                                                                                                                                                                                                                                                                                                                                                          |
|----------------------------------------------------------------------------------------------------------------------------------------------------------------------------------------------------------------------------|------------------------------------------------------------------------------------------------------------------------------------------------------------------------------------------------------------------------------------------------------------------------------------------------------------------------------------------------------------------------------------------|
| Patients: Older patients with acute myeloid leukaemia (AML) data from four Southwest Oncology Group (SWOG, 1992-2009) and five UK National Cancer Research Institute/Medical Research Council (MRC/NCRI, 1988-2010) trials |                                                                                                                                                                                                                                                                                                                                                                                          |
| ?                                                                                                                                                                                                                          | Patients previously untreated, treatment with intensive chemotherapy, age $\geq 55$ years                                                                                                                                                                                                                                                                                                |
| ?                                                                                                                                                                                                                          | Patients excluded (acute promyelocytic leukemia)                                                                                                                                                                                                                                                                                                                                         |
| <b>156 (SWOG)</b><br><b>1258 (MRC/NCRI)</b>                                                                                                                                                                                | Patients included for analysis (SWOG: training population; MRC/NCRI: validation population; combined population for analyses A11-A13)                                                                                                                                                                                                                                                    |
| Treatment and follow-up: Intensive chemotherapy. Follow-up length not mentioned                                                                                                                                            |                                                                                                                                                                                                                                                                                                                                                                                          |
| Markers:                                                                                                                                                                                                                   | M1=NPM1 (+/-), M2=FLT3-ITD (+/-), M3 (combination of M1 and M2)=M1+ and M2- vs. others                                                                                                                                                                                                                                                                                                   |
| Outcomes (Events):                                                                                                                                                                                                         | O1: Overall survival (OS, n=?)<br>O2: Relapse free survival <sup>1</sup> (RFS, n=?)<br>O2: 2-year OS (rates given, no numbers of events <sup>2</sup> )<br>O3: 2-year RFS (rates given, no numbers of events)<br>O4: Therapy-related mortality (TRM, SWOG: n=0; NCRI: n=131)<br>O5: Complete remission (CR, SWOG: n=97; NCRI: n=903)<br>O6: 1-year relapse rate (SWOG: n=45; NCRI: n=378) |
| Further variables:                                                                                                                                                                                                         | v1cont=age (cont.), v1cat=age (binary, cutpoint 65), v2=WBC count, v3=BM blast percentage, v4=sex, v5=ECOG PS (0-1, >1), v6=cytogenetics (unfavourable/other), v7=secondary AML <sup>3</sup> , v8=platelet count, v9=IDH1/2, v10=DNMT3A                                                                                                                                                  |

Abbreviations: NPM1=nucleophosmin, FLT3-ITDs=internal tandem duplications in FMS-related tyrosine kinase 3, WBC=white blood cell, BM=bone marrow, ECOG PS=Eastern Cooperative Oncology Group performance status

<sup>1</sup> As measured from the date of complete remission; thus, RFS only calculated for CR cases (n=97)

<sup>2</sup> Rates for 2-year OS and 2-year RFS are mislabelled as numbers of events in Tabs. 1, A1, A3 and A4 (probably a formatting error in the tables).

<sup>3</sup> Result of treatment of previous (other) cancer, diagnosis before start of treatment, only used in descriptive analyses

## B. Statistical analysis of survival outcomes

| Aim                                                                                    | n                                | Outcome (events)                                                     | Variables considered                  | Results/ remarks                                                               |
|----------------------------------------------------------------------------------------|----------------------------------|----------------------------------------------------------------------|---------------------------------------|--------------------------------------------------------------------------------|
| Description, SWOG                                                                      | 156                              |                                                                      | v1cont, v2-v8, M1-M3, outcomes        | Results, Tab. A1                                                               |
| A1(SWOG):<br>Multivariable analysis                                                    | ? (due to missing for v5 and v6) | OS (?), RFS (?)                                                      | M1, M2, v1cont, v2-v6, v8             | HR (+CI), p-values, Results, Tab. A2                                           |
| IDA1(SWOG):<br>Relationship of v1cat with other variables                              | 156                              |                                                                      | M1, M2, M3, v1cat, v2-v6, SWOG study# | 2 x k tables, p-values, Tab. 1                                                 |
| A2(SWOG):<br>Univariate, influence of v1cat on outcome                                 | Varies                           | TRM (0), CR (97), 2-year OS (?), 2-year RFS (?), 1-year relapse (45) | v1cat                                 | p-values, Tab. 1                                                               |
| A3(SWOG):<br>Multivariable, in v1cat subgroups                                         | ?                                | OS (?), RFS (?)                                                      | M1, M2, v1cat, v2-v6, v8              | HR (+CI), p-values, Tab. 2<br>As A1, but in subgroups                          |
| A4(SWOG):<br>univariate                                                                | OS 156, RFS 97                   | OS (?), RFS (?)                                                      | M3, v1cat                             | Kaplan-Meier estimates, p-values, Figs. 1A, 1B, A1A, A1B                       |
| A5(SWOG):<br>Multivariable, M3 in v1cat subgroups                                      | ?                                | OS (?)                                                               | M3, v1cat, v2-v6, v8                  | HR (+CI), p-values, Tab. 3                                                     |
| A6(SWOG):<br>Multivariable, test for interaction between v1 and M3                     | 156                              | -                                                                    | M3, v1cat, other variables?           | p-value, Results Mentions “multivariable”, but which variables included?       |
| A7(SWOG):<br>Univariate, in v1cat and SWOG study# subgroups to control for treatment   | 98                               | OS (?), RFS (?)                                                      | M3                                    | Kaplan-Meier estimates, p-values, Figs. 1A, 1C, A1C                            |
| IDA2(SWOG):<br>Relationship of v1cat with other variables, but in subgroup M3-positive | 32                               |                                                                      | v1cat, v2-v7, v9, v10                 | 2xk tables, p-values, Tab. 4. Results as for IDA1, but in M3-positive subgroup |

|                                                                                   |      |                                                                                      |                                                               |                                                                                                            |
|-----------------------------------------------------------------------------------|------|--------------------------------------------------------------------------------------|---------------------------------------------------------------|------------------------------------------------------------------------------------------------------------|
| A8(SWOG):<br>Univariate, influence of v1cat on outcome, in subgroup M3-positive   | 32   | TRM (0),<br>CR (23),<br>2-year OS (?),<br>2-year RFS (?),<br>1-year relapse (?)      | v1 cat                                                        | Kaplan-Meier estimates, p-values, Tab. 4, Figs 1D, A1D, A2. Results as for A2, but in M3-positive subgroup |
| IDA3(NCRI):<br>Relationship of v1cat with other variables                         | 1258 |                                                                                      | M1-M3, v1cat, v2-v6                                           | 2xk tables, p-values, Tab. A3, Results as for IDA1, but in validation population                           |
| A9(NCRI):<br>Univariate, influence of v1cat on outcome                            | 1258 | TRM (131),<br>CR (903),<br>2-year OS (?),<br>2-year RFS (?),<br>1-year relapse (374) | v1cat                                                         | p-values, Tab A3                                                                                           |
| IDA4(NCRI):<br>Relationship of v1cat with other variables in subgroup M3-positive | 209  |                                                                                      | M1-M3, v1cat, v2-v6                                           | 2xk tables, p-values, Tab. A4, Results as for IDA2, but in validation population                           |
| A10(NCRI):<br>Univariate, as A8 in subgroup M3-positive                           | 209  | TRM (18),<br>CR (178),<br>2-year OS (?),<br>2-year RFS (?),<br>1-year relapse (44)   | v1cat                                                         | Tab A4, Kaplan-Meier estimates, Figs. 2A, 2B, A2                                                           |
| A11(combined):<br>Prognostic significance of M3 in subgroup CN-AML*               | 743  | OS (?)                                                                               | M3, v1cat                                                     | Kaplan-Meier estimates, p-values, Figs. A3A, A3B, Results                                                  |
| A12(combined):<br>Univariate, subgroup M3-positive patients in CN-AML             | 202  | OS (?)                                                                               | M3, v1cat                                                     | Kaplan-Meier estimate, p-value, Fig. A3C, Results                                                          |
| A13(combined):<br>Multivariable, test for interaction between v1cont and v6       | 1414 |                                                                                      | M3, v1cat (probably, not explicitly stated), other variables? | p-value, Results                                                                                           |
| Statistical software packages used:                                               |      |                                                                                      | No information given                                          |                                                                                                            |

\*CN-AML = cytogenetically normal acute myeloid leukaemia, i.e. no clonal abnormalities in  $\geq 20$  metaphases analysed

Xing et al (2015) Association between BRAF V600E mutation and recurrence of papillary thyroid cancer. *J. Clin. Oncol.* **33**: 42–50, doi:10.1200/JCO.2014.56.8253

A. Patients, treatment, and variables

|                                                                                                                                                                                                                                                  |                                                                                                                                                                                                                                                    |
|--------------------------------------------------------------------------------------------------------------------------------------------------------------------------------------------------------------------------------------------------|----------------------------------------------------------------------------------------------------------------------------------------------------------------------------------------------------------------------------------------------------|
| Patients: Consecutively-selected patients treated for papillary thyroid cancer (PTC) at 16 medical centers in 8 countries (USA, Italy, Poland, Japan, Australia, Spain, Czech Rep, South Korea), over differing time periods spanning 1978-2011. |                                                                                                                                                                                                                                                    |
| ?                                                                                                                                                                                                                                                | Patients assessed                                                                                                                                                                                                                                  |
| ?                                                                                                                                                                                                                                                | Patients excluded                                                                                                                                                                                                                                  |
| <b>2099</b>                                                                                                                                                                                                                                      | Patients included for analysis, subgroups by v8 (v8-S1: CPTC, n=1448; v8-S2: FVPTC, n=431), v9 (v9-S1: Stage I, n=1273; v9-S2: Stage II, n=234) and v4 (v4-S1: tumor size ≤1.0cm, n=534)<br>Missing data not mentioned – appears to have been none |
| Treatment and follow-up: Total thyroidectomy and neck dissection in all patients, postoperative hormone suppression and radioiodine ablation (in all centers except the Japanese center). Median follow-up 36 months (IQR 14 to 75 months)       |                                                                                                                                                                                                                                                    |
| Marker:                                                                                                                                                                                                                                          | M = BRAF V600E mutation(positive/negative)                                                                                                                                                                                                         |
| Outcome (events):                                                                                                                                                                                                                                | Recurrence free survival (RFS, events overall: n=338; in subgroups: v8-S1: n=247, v8-S2: n=43, v9-S1: n=119, v9-S2: n=32, v4-S1: n=57. Expressed as both a proportion of recurrences, and as rate of recurrence per 1000 person-years of follow-up |
| Further variables:                                                                                                                                                                                                                               | v1=age, v2=sex, v3=medical center, v4=tumor size, v5=extrathyroidal invasion, v6=lymph node metastasis, v7=multifocality, v8=PTC subtype, v9=tumor stage<br>Adjustment model 2: v1-v3; model 3: v1-v8                                              |

Abbreviations: CPTC=conventional PTC, FVPTC=follicular-variant PTC

B. Statistical analysis of survival outcomes

| Aim                                                                                   | n                       | Outcome (Events) | Variables considered | Results/ remarks                                                                                                                        |
|---------------------------------------------------------------------------------------|-------------------------|------------------|----------------------|-----------------------------------------------------------------------------------------------------------------------------------------|
| C1: Check of proportional hazards assumption after initially fitting models A2 and A3 |                         |                  |                      | Led to stratification by medical center (v3) and revision of these analyses                                                             |
| IDA1: Computation of rates of recurrence per 1000 person-years                        | Total and all subgroups |                  |                      | Displayed in Tables 2, 4 and A3                                                                                                         |
| A1: Univariate unadjusted model 1                                                     | All                     | 2099             | RFS (338)            | Poisson regression p-values and CI; Cox regression HR, CI: Tab. 2; Kaplan-Meier estimates of recurrence-free survival, p-values: Fig. 1 |
|                                                                                       | v8-S1                   | 1448             | RFS (247)            |                                                                                                                                         |
|                                                                                       | v8-S2                   | 431              | RFS (43)             |                                                                                                                                         |

|                                                                                    |       |                    |              |                              |                                                                     |
|------------------------------------------------------------------------------------|-------|--------------------|--------------|------------------------------|---------------------------------------------------------------------|
| A2: Multivariable model 2                                                          | All   | 2099               | RFS (338)    | M, v1-v3                     | p-values, HR, CI, Tab. 2                                            |
|                                                                                    | v8-S1 | 1448               | RFS (247)    |                              |                                                                     |
|                                                                                    | v8-S2 | 431                | RFS (43)     |                              |                                                                     |
| A3: Multivariable model 3                                                          | All   | 2099               | RFS (338)    | M, v1-v8                     | p-values, HR, CI, Tab. 2                                            |
|                                                                                    | v8-S1 | 1448               | RFS (247)    |                              |                                                                     |
|                                                                                    | v8-S2 | 431                | RFS (43)     |                              |                                                                     |
| A4: Sensitivity analysis, excluding patients with <3 year follow-up, no recurrence |       | ?                  | RFS ?        | M                            | Results p.44 Text. Data not shown                                   |
| A5: Interaction of M with conventional risk factors, univariate                    |       | 2099               | RFS (338)    | M, v1 (dichotomized), v5, v6 | Kaplan-Meier estimates, p-values, Fig. 2, Synergy Index, CI, Tab. 3 |
| A6: Low risk patients, unadjusted model 1                                          | v9-S1 | 1273               | RFS (119)    | M                            | Poisson regression p-values and CI; Cox regression HR, CI: Tab. 4   |
|                                                                                    | v9-S2 | 234                | RFS (32)     |                              |                                                                     |
|                                                                                    | v4-S1 | 534                | RFS (57)     |                              |                                                                     |
| A7: Low risk patients, multivariable model 2                                       | v9-S1 | 1273               | RFS (119)    | M, v1-v3                     | p-values, HR, CI, Tab. 4                                            |
|                                                                                    | v9-S2 | 234                | RFS (32)     |                              |                                                                     |
|                                                                                    | v4-S1 | 534                | RFS (57)     |                              |                                                                     |
| A8: Low risk patients, multivariable model 3                                       | v9-S1 | 1273               | RFS (119)    | M, v1-v8                     | p-values, HR, CI, Tab. 4                                            |
|                                                                                    | v9-S2 | 234                | RFS (32)     |                              |                                                                     |
|                                                                                    | v4-S1 | 534                | RFS (57)     |                              |                                                                     |
| A9: Univariate model in v4 subgroups                                               |       | Varies by subgroup | RFS (Varies) | M                            | p-values, HR, CI, Tab. A2                                           |
| A10: Univariate model for 35 subgroups by v1, v2 and v8                            |       | Varies by subgroup | RFS (Varies) | M                            | HR, CI, Tab. A4                                                     |
| Statistical software packages used:                                                |       |                    | SAS v.9.3    |                              |                                                                     |
